# Supplementary material for: Macrophage migration inhibitory factor (MIF) acetylation protects neurons from ischemic injury
Source: PubMed Central journal article supplement (PMC9117661; doi:10.1038/s41419-022-04918-2), 2022-05-18
Supplement: 41419_2022_4918_MOESM11_ESM.pdf [file 41419_2022_4918_MOESM11_ESM.pdf]

This document certifies that the manuscript

## **Macrophage migration inhibitory factor (MIF) acetylation protects neurons from ischemic injury**

prepared by the authors

**Jin-Xia Hu, Wei-Jing Ma, Li-Ying He, Cong-Hui Zhang, Cheng Zhang, Yan Wang, Chao-Nan Chen, Da-Yong Shen, Hui-Min Gao, Rui-Ru Guo, Qian-Qian Ning, Xin-Chun Ye, Gui-Yun Cui, and Lei Li**

was edited for proper English language, grammar, punctuation, spelling, and overall style by one or more of the highly qualified native English speaking editors at AJE.

This certificate was issued on **March 25, 2022** and may be verified on the [AJE website](#) using the verification code **2D6B-C9DA-FBB7-7703-OF6D**.

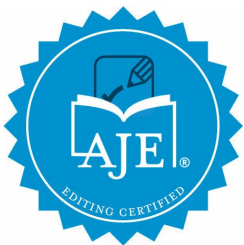

Neither the research content nor the authors' intentions were altered in any way during the editing process. Documents receiving this certification should be English-ready for publication; however, the author has the ability to accept or reject our suggestions and changes. To verify the final AJE edited version, please visit our verification page at [aje.com/certificate](#). If you have any questions or concerns about this edited document, please contact AJE at [support@aje.com](mailto:support@aje.com).
